# Supplementary material for: A highly efficient microfluidic nano biochip based on nanostructured nickel oxide
Source: Royal Society of Chemistry journal article supplement (doi:10.1039/c3nr33459g), 2013-01-01
Supplement: c3nr33459g.pdf [file c3nr33459g.pdf]

## SUPPORTING INFORMATION

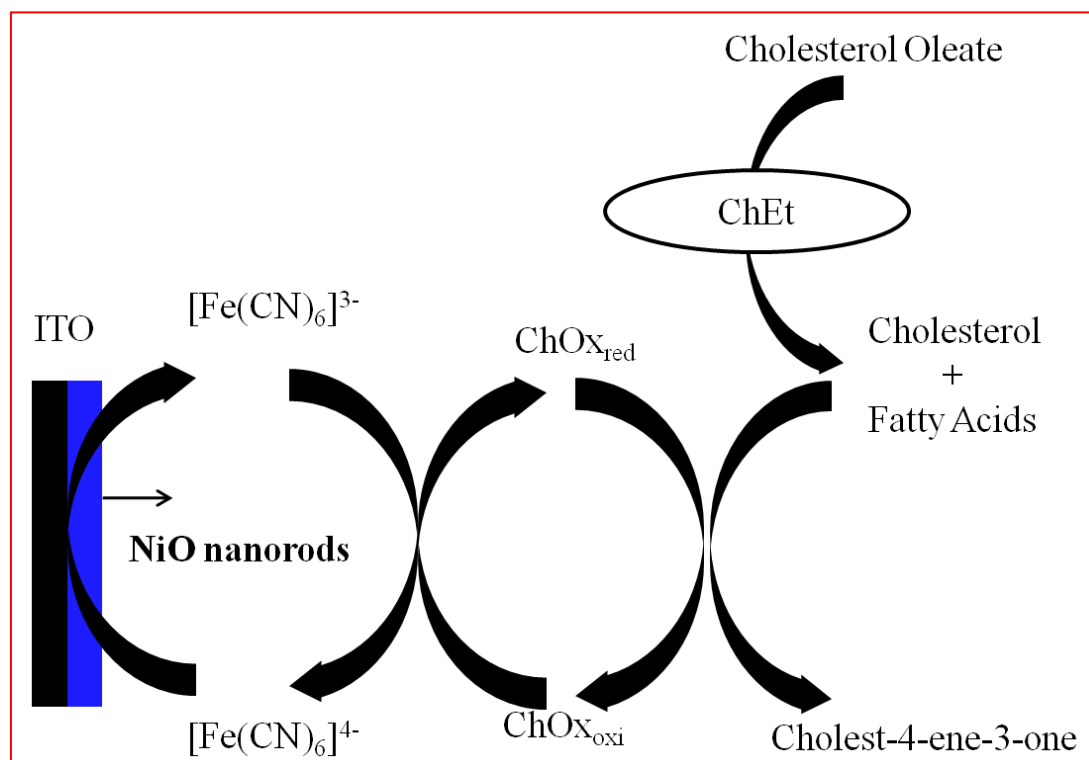

**Scheme S1** The biochemical reaction for total cholesterol detection based on NRs-NiO

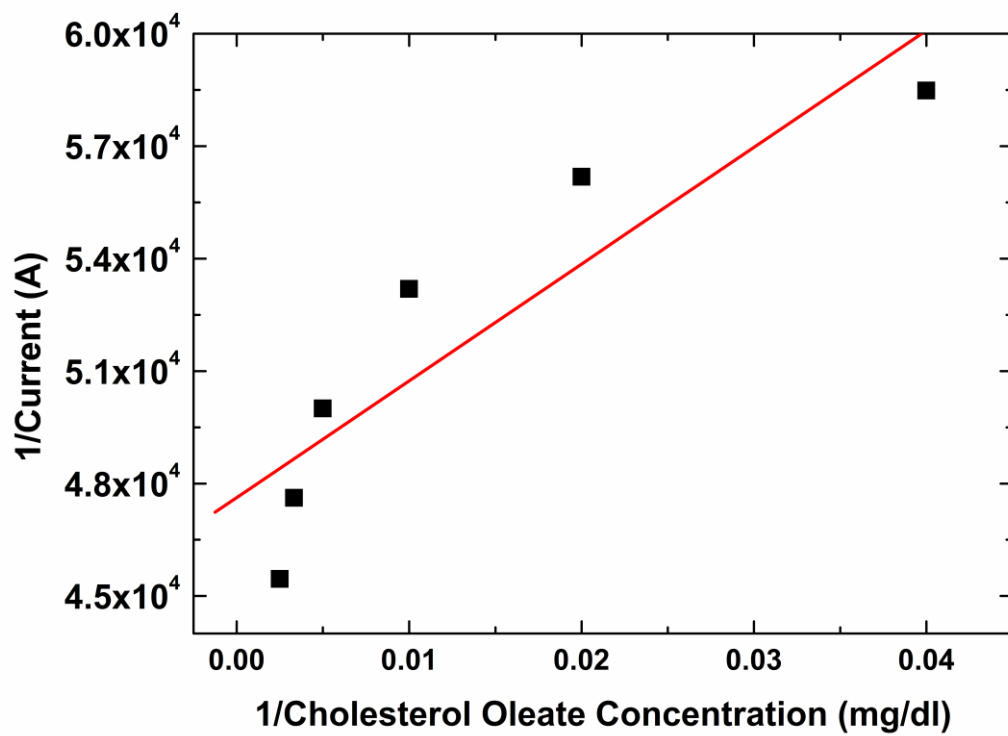

**Figure S1** The Lineweaver–Burke plot for estimation of  $K_m$

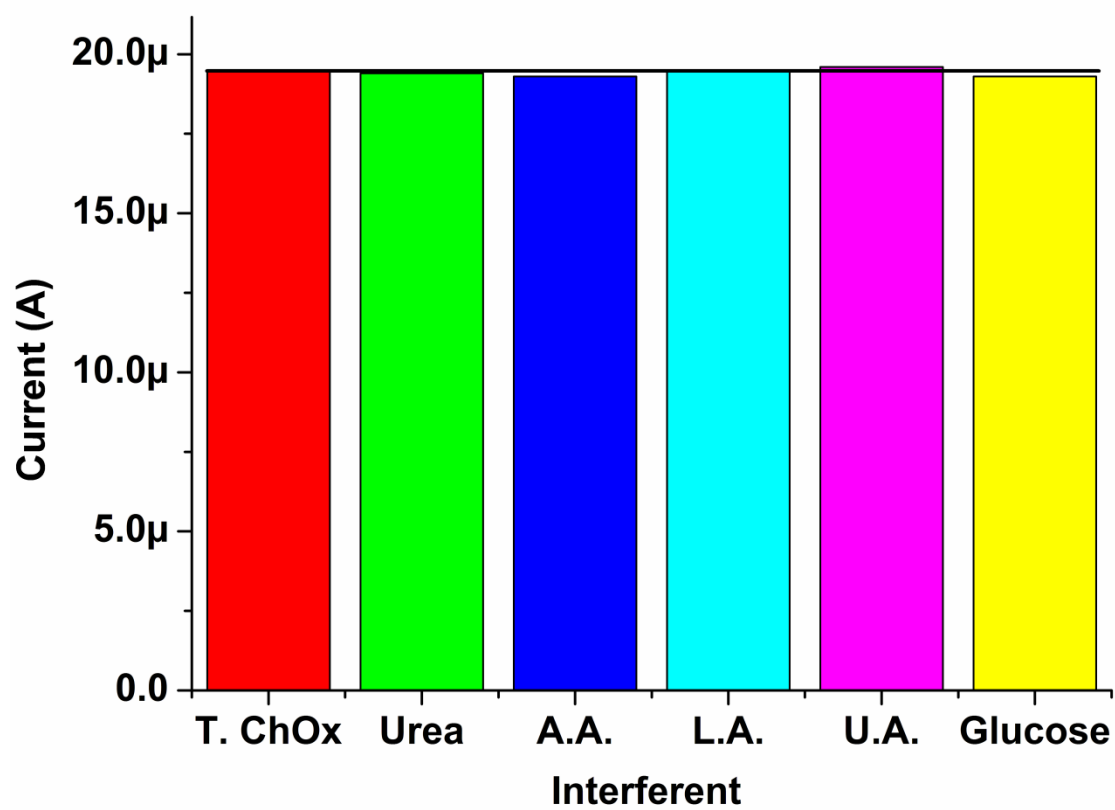

**Figure S2** Interferents studies for the ChEt-ChOx/NR-NiO/ITO bioelectrode as a function of different analytes

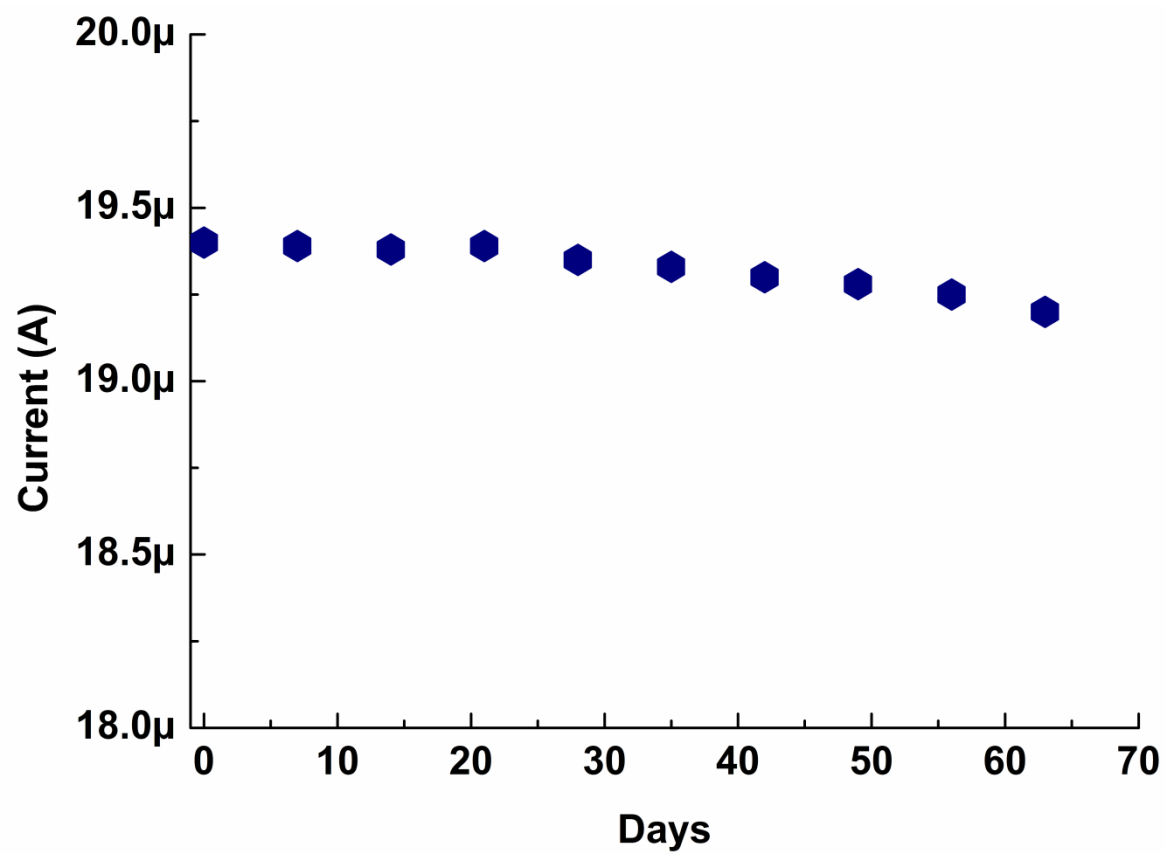

**Figure S3** Stability studies of the ChEt-ChOx/NR-NiO/ITO bioelectrode as a function of days
